## ENERGIZATION OF SODIUM ABSORPTION BY THE H<sup>+</sup>-ATPase PUMP IN MITOCHONDRIA-RICH CELLS OF FROG SKIN

BY BRIAN J. HARVEY\*

*Département de Biologie Cellulaire et Moléculaire, Commissariat à l'Energie Atomique, Laboratoire Jean Maetz BP 68, F-06230 Villefranche-sur-mer, France*

### Summary

The frog skin *in vivo* is capable of active transepithelial H<sup>+</sup> secretion ( $J_H$ ) which is matched by Na<sup>+</sup> absorption ( $J_{Na}$ ). Studies *in vitro* demonstrate that  $J_H$  is generated by an H<sup>+</sup>-ATPase pump localized in apical membranes of mitochondria-rich (MR) cells, whereas  $J_{Na}$  occurs through an amiloride-sensitive pathway in principal (P) cells. The H<sup>+</sup> pump is sensitive to inhibitors of carbonic anhydrase (e.g. acetazolamide) and to specific inhibitors of mitochondrial F<sub>1</sub>F<sub>0</sub> H<sup>+</sup>-ATPase (oligomycin) and vacuolar (V)-type H<sup>+</sup>-ATPase (*N*-ethylmaleimide) and to inhibitors of both these types of H<sup>+</sup>-ATPases (dicyclohexylcarbodiimide, DCCD).  $J_H$  is independent of external K<sup>+</sup>, which differentiates it from gastric H<sup>+</sup>/K<sup>+</sup>-ATPase and is strictly dependent on aerobic metabolism. The proton pump is primarily implicated in whole-body acid-base regulation. Acute stimulation of  $J_H$  in response (seconds–minutes) to an acid load involves insertion of H<sup>+</sup> pumps (exocytosis) from a cytosolic pool into the apical membrane. The chronic response (days) to metabolic acid load involves morphological changes (increased apical membrane surface area and number of MR cells). Whole-cell patch-clamp recordings of membrane capacitance and current fluctuations from MR cells demonstrate that a respiratory acid load and aldosterone produce rapid exocytotic insertion of DCCD-sensitive conductive membrane.

A secondary role of the H<sup>+</sup> pump is to energize sodium absorption ( $J_{Na}$ ) *via* principal cells from dilute solutions in the absence of a permeant anion under open-circuit conditions. The apparent 1:1 stoichiometry between  $J_H$  and  $J_{Na}$  is a result of transepithelial electrical coupling between these electrogenic fluxes. The H<sup>+</sup> pump in MR cells generates a transepithelial current (serosa to apical) which acts as a physiological voltage-clamp to hyperpolarize the apical membrane of P cells. This hyperpolarization can facilitate passive Na<sup>+</sup> entry across the apical membrane against a threefold chemical gradient. Since both  $J_H$  and  $J_{Na}$  are sensitive to membrane potential, inhibition or activation of one will produce similar effects on the transport of the other ion. For example, inhibition of  $J_H$  by ethoxzolamide will reduce  $J_{Na}$ . Conversely, blocking  $J_{Na}$  with amiloride also inhibits  $J_H$ . These effects can be avoided or reversed if variations in membrane potential are prevented by voltage-clamping the epithelium. A paradoxical activation of  $J_{Na}$  is observed when  $J_H$  is stimulated by an acid load (CO<sub>2</sub>), despite inhibition of Na<sup>+</sup> channel activity by H<sup>+</sup> in P cells. Patch-clamp studies reveal the presence of Na<sup>+</sup> channels in MR cells which may provide a route for Na<sup>+</sup> absorption energized by the H<sup>+</sup> pump when Na<sup>+</sup> channels in P cells are closed by an acid load.

\*Present address: Department of Physiology, University College Cork, Ireland.

**Key words:** mitochondria-rich cells, principal cells, H<sup>+</sup> secretion, Na<sup>+</sup> absorption, Na<sup>+</sup> channels, H<sup>+</sup>-ATPase, intracellular pH, patch-clamp, exocytosis, membrane capacitance, aldosterone.

### Introduction

The frog skin *in vivo* absorbs sodium and secretes hydrogen ions (Krogh, 1939) in an apparent 1:1 stoichiometry (Garcia-Romeu *et al.* 1969). The *in vitro* amphibian skin and urinary bladder mounted in an Ussing chamber can also actively secrete hydrogen ions under appropriate electrochemical gradients (Frazier and Vanatta, 1971; Ludens and Fanestil, 1972; Machen and Erlij, 1975; Ehrenfeld and Garcia-Romeu, 1977; Ramsay, 1982). The outermost living cell layer of frog skin epithelium (the first reactive cell layer) is composed of two cell types, cuboidal granular cells and mitochondria-rich cells (MR). The granular cells along with the deeper spinosum and germinativum cells form a functional sodium transport syncytium (Rick *et al.* 1978). The  $\text{Na}^+$  absorption function of the epithelium is carried out by these principal (P) cells (Koefoed-Johnsen and Ussing, 1958; Kristensen and Ussing, 1985), whereas active  $\text{H}^+$  secretion is restricted to the mitochondria-rich cells (Harvey and Ehrenfeld, 1988a; Ehrenfeld *et al.* 1989).

The specialized transport functions of MR cells and principal cells are found in a wide range of high-resistance epithelia.  $\text{Na}^+$  absorption and  $\text{H}^+$  secretion mechanisms are similar in amphibian skin and urinary bladder, gill of freshwater fish and crustaceans and in mammalian colon and renal collecting tubule (Kelly *et al.*, 1980; Schwartz *et al.* 1982; Madsen and Tisher, 1985; Durham and Nagel, 1986; Koeppen, 1987; Steinmetz, 1988; Harvey and Ehrenfeld, 1988a; Sauer *et al.* 1990; Larsen, 1991; Kirschner, 1982, 1988; Krippeit-Drews *et al.* 1989; Avella and Bornancin, 1990; Perrone *et al.* 1990; Frömter, 1988). The proton secretion function and high carbonic anhydrase content of MR cells in amphibian skin (Ehrenfeld *et al.* 1985; Rosen and Friedley, 1973; Katz and Gabbay, 1988) indicate a close similarity with the alpha-type intercalated cell of collecting tubule and turtle urinary bladder (Steinmetz, 1974, 1986; Schwartz and Steinmetz, 1977; Dixon and Al-Awqati, 1979; Husted *et al.* 1981; Steinmetz and Andersen, 1982; Brown *et al.* 1988a). Proton secretion in frog skin is affected by agents which inhibit different types of  $\text{H}^+$ -ATPases (for reviews on pharmacology of  $\text{H}^+$  pumps, see Senior and Wise, 1983; Solioz, 1984; Stone and Xie, 1988; Forgac, 1989; Al-Awqati, 1986). Inhibitors of V-ATPase, such as dicyclohexylcarbodiimide (DCCD) and *N*-ethylmaleimide (NEM), are effective blockers of  $J_{\text{H}}$ , as are diethylstilboestrol (DES) and oligomycin (Ehrenfeld *et al.* 1985, 1990; Sabolic and Burckhardt, 1986; Harvey and Ehrenfeld, 1988a), which interact with  $\text{F}_1\text{F}_0$ -class ATPases (Fanestil and Park, 1981; Strid *et al.* 1988). Inhibition of  $J_{\text{H}}$  by vanadate (which is ineffective against F-ATPases and V-ATPases) may be direct (Arruda *et al.* 1981) or indirect *via* effects on metabolism or insertion of  $\text{H}^+$  pumps into the plasma membrane. In this paper I will focus mainly on the role of the vacuolar  $\text{H}^+$ -ATPase (V-ATPase) pump in energizing  $\text{Na}^+$  absorption across frog skin. I will describe novel uses of ion-sensitive microelectrodes and patch-clamp techniques to study the cellular pathways involved in  $J_{\text{H}}$  and  $J_{\text{Na}}$  and the rapid regulation of  $\text{H}^+$  secretion in single MR cells by the exocytotic insertion of membrane containing active proton pumps.

### Energization of $\text{Na}^+$ uptake by the proton pump

The transport pathways for transepithelial  $\text{H}^+$  secretion and  $\text{Na}^+$  absorption through mitochondria-rich and principal cells are summarized in Fig. 1. Most *in vitro* studies of

$\text{Na}^+$  absorption in frog skin use high- $\text{NaCl}$  Ringer's solution bathing both sides of the tissue whereas *in vivo*  $\text{Na}^+$  uptake occurs from more dilute external solutions. For example, frogs can absorb  $\text{Na}^+$  in the absence of a permeant anion from fresh water containing less than  $2 \text{ mmol l}^{-1} \text{ Na}^+$ . Under these conditions,  $J_{\text{Na}}$  and  $J_{\text{H}}$  are coupled in an apparent 1:1 stoichiometry and electroneutrality is conserved by equal movements of  $\text{Na}^+$  and  $\text{H}^+$  in opposite directions, but through different cell types (Harvey and Ehrenfeld, 1988a). The action of the V-ATPase pump in energizing  $\text{Na}^+$  uptake across apical membranes of P cells is illustrated by the experiment in Fig. 2. A double-barrelled  $\text{Na}^+$ -sensitive microelectrode was used to measure intracellular  $\text{Na}^+$  activity ( $A_{\text{Na}}^i$ ) in P cells during electrical and pharmacological modulation of  $J_{\text{Na}}$  and  $J_{\text{H}}$ .

When  $J_{\text{H}}$  is inhibited by acetazolamide, the loss of transepithelial proton current produces a depolarized transepithelial potential (serosal side becomes more positively charged) and the apical membrane of principal cells also depolarizes. This results in a decrease in the driving force for  $\text{Na}^+$  uptake and a fall in intracellular  $\text{Na}^+$  activity  $A_{\text{Na}}^i$  (Fig. 2). Short-circuiting the tissue renders  $J_{\text{Na}}$  independent of  $J_{\text{H}}$  and restores  $\text{Na}^+$  uptake (Fig. 2). The dependence of  $J_{\text{Na}}$  on electrical gradients is critical under physiological ion gradients. In P cells exposed to dilute apical saline ( $2 \text{ mmol l}^{-1} \text{ Na}^+$ ) under open-circuit conditions, intracellular  $\text{Na}^+$  activity is three times that in the external solution. A favourable electrical gradient exists, however, for passive uptake of  $\text{Na}^+$  even down to an external  $\text{Na}^+$  concentration of  $0.1 \text{ mmol l}^{-1}$  (Harvey and Kernan, 1984). Under these conditions,  $\text{Na}^+$  uptake in P cells is energized by a transepithelial electrical gradient generated by rheogenic  $\text{H}^+$  secretion through MR cells. Sodium uptake through P cells can be calculated from the instantaneous rate of change in intracellular  $\text{Na}^+$  activity ( $\Delta A_{\text{Na}}^i$ ) after closure of apical  $\text{Na}^+$  channels by amiloride (Harvey and Kernan, 1984). The equivalence between  $\Delta A_{\text{Na}}^i$  and  $J_{\text{Na}}$  (Fig. 2) supports the hypothesis that principal cells constitute the main pathway for  $\text{Na}^+$  absorption when  $J_{\text{Na}}$  is either coupled or uncoupled to  $J_{\text{H}}$ .

In the absence of an impermeant anion,  $J_{\text{Na}}$  is rate-limited by charge balance from rheogenic proton secretion. Hormones such as oxytocin or vasopressin, which increase apical  $\text{Na}^+$  permeability in P cells but which do not directly stimulate  $J_{\text{H}}$ , fail to activate  $\text{Na}^+$  absorption when  $J_{\text{Na}}$  and  $J_{\text{H}}$  are coupled (Ehrenfeld *et al.* 1990). Thus, the rate of acid secretion, or more precisely the acid-base status of the animal, will set an upper limit to  $\text{Na}^+$  absorption.

### Effects of electrical potential and acid load on $\text{Na}^+$ and $\text{H}^+$ transport

A transepithelial voltage-clamp produces opposite effects on  $J_{\text{Na}}$  and  $J_{\text{H}}$  (Fig. 3A). At negative serosal potentials,  $J_{\text{Na}}$  is stimulated whereas  $J_{\text{H}}$  decreases. Transepithelial potential gradients have been shown to act, *via* changes in apical membrane potential, on separate electrogenic pathways for  $\text{Na}^+$  uptake in principal cells and  $\text{H}^+$  secretion in mitochondria-rich cells (Ehrenfeld *et al.* 1985; Harvey and Ehrenfeld, 1986). The effects on  $\text{Na}^+$  uptake of acid-loading the epithelium are dependent on the relationship existing between  $J_{\text{Na}}$  and  $\text{H}^+$  secretion (Harvey and Ehrenfeld, 1988b). Under conditions where  $J_{\text{Na}}$  and  $J_{\text{H}}$  are coupled (open-circuited skins exposed to dilute external saline or

impermeant anions), an acid load produces a reversible increase in net  $\text{Na}^+$  absorption (Fig. 3B,C). The basal and acid-stimulated  $J_{\text{Na}}$  are completely blocked by micromolar concentrations of amiloride and not affected by ethylisopropyl amiloride, an inhibitor of electroneutral  $\text{Na}^+/\text{H}^+$  exchange. These findings implicate amiloride-blockable  $\text{Na}^+$  channels as the pathway for the acid-stimulated  $\text{Na}^+$  uptake process. Under short-circuit conditions, when  $J_{\text{Na}}$  is independent of  $J_{\text{H}}$ , net  $\text{Na}^+$  absorption is inhibited by metabolic or respiratory acid loads (Fig. 3D).

### Proton pumps are localized to mitochondria-rich cells

The 1:1 electrical coupling between  $J_{\text{Na}}$  and  $J_{\text{H}}$  in the absence of a permeant anion would seem to indicate that the underlying transport mechanisms are localized to the same cell. Measurements of intracellular  $\text{Na}^+$  activity with double-barrelled ion-sensitive microelectrodes demonstrate that  $\text{Na}^+$  uptake occurs essentially through principal cells even under conditions of tight coupling between  $J_{\text{Na}}$  and  $J_{\text{H}}$ . Indirect evidence places the proton pump in MR cells. Correlation between  $J_{\text{H}}$  and MR cell number and apical surface area (Ehrenfeld *et al.* 1990), the high carbonic anhydrase activity of these cells (Rosen and Friedley, 1973; Katz, 1986) and the inhibition of  $J_{\text{H}}$  by acetazolamide (Ehrenfeld and Garcia-Romeu, 1977) constitute the strongest proof. Adaptation to different environmental salinities and acid-base or hormonal challenges can change the number and morphology of MR cells, which correlate with alterations in  $J_{\text{H}}$  (Frazier, 1978; Ilic and Brown, 1980; Katz, 1986; Page and Frazier, 1987; Ehrenfeld *et al.* 1989), as found for intercalated cells of turtle urinary bladder (Husted *et al.* 1981; Schwartz *et al.* 1985; Steinmetz and Stetson, 1987) and in renal collecting duct (Madsen and Tisher, 1984).

I have sought direct evidence for the presence of V-ATPase pumps in MR cells by scanning pH gradients above MR cells. Double-barrelled pH-sensitive microelectrodes

---

Fig. 1. Schematic representation of ion transport through mitochondria-rich (MR) cells and principal (P) cells of isolated frog skin. (A) Conditions which resemble the *in vivo* state. Net  $\text{Na}^+$  uptake in P cells is indirectly electrically coupled to proton secretion in MR cells with 1:1 stoichiometry under open-circuit conditions in the absence of transepithelial anion fluxes. Under control conditions (apical side bathed in  $\text{Na}_2\text{SO}_4$  or  $2 \text{ mmol l}^{-1}$  NaCl solution buffered to pH 7.4 with  $4 \text{ mmol l}^{-1}$  imidazole, serosal side bathed in NaCl Ringer's solution buffered with 5%  $\text{CO}_2$ ,  $24 \text{ mmol l}^{-1}$   $\text{HCO}_3^-$ ), proton secretion is driven by a V-ATPase pump in the apical membranes of MR cells and the bulk of  $\text{Na}^+$  absorption occurs through amiloride-sensitive channels in P cells ( $\text{Na}^+$  chemical gradients are shown in  $\text{mmol l}^{-1}$ ). The MR cell and the P cell generate equal and opposite  $\text{H}^+$  and  $\text{Na}^+$  currents, respectively. An acid load stimulates both carbonic-anhydrase-dependent  $\text{H}^+$  secretion and amiloride-sensitive  $\text{Na}^+$  absorption, despite inhibition of  $\text{Na}^+$  and  $\text{K}^+$  channels by  $\text{H}^+$  in P cells. Proton-coupled  $\text{Na}^+$  absorption in an acid load may occur *via* MR cells which can buffer changes in intracellular pH by activation of  $\text{H}^+$  pumps and the dynamic buffering power of carbonic anhydrase. (B) Under classical experimental conditions in which the tissue is short-circuited (with or without a permeant anion) or open-circuited in NaCl Ringer's solution bathing both sides,  $\text{Na}^+$  absorption occurs exclusively at a high rate through P cells and is uncoupled from  $\text{H}^+$  secretion. Electroneutrality is conserved by equivalent movement of  $\text{Cl}^-$  (through the shunt or *via* MR cells) or by electrons from the external electron-motive force. An acid load under these conditions inhibits  $\text{Na}^+$  uptake through P cells, resulting in a reduction of transepithelial  $\text{Na}^+$  absorption. *I*, current; *E*, electrochemical potential.

placed  $0.2\ \mu\text{m}$  above the apical membrane of MR cells detected a fall in extracellular pH (pHe) under conditions when active  $\text{H}^+$  secretion was abruptly stimulated (voltage-clamping  $V_i$  from  $-100\ \text{mV}$  to  $+100\ \text{mV}$ ) (Fig. 4). The voltage-activated extracellular acidification ( $\Delta\text{pHe}$ ) was observed solely above the pit of MR cells and never when the pH electrode was above principal cells.  $\Delta\text{pHe}$  was blocked by the  $\text{H}^+$ -ATPase probe (Solioz, 1984) dicyclohexylcarbodiimide ( $10\ \mu\text{mol l}^{-1}$ ) or by the carbonic anhydrase inhibitor ethoxzolamide ( $100\ \mu\text{mol l}^{-1}$ ) added to the apical solution (Fig. 4). The instantaneous rate of change in pHe was used to calculate  $\text{H}^+$  flux in single HR cells; it

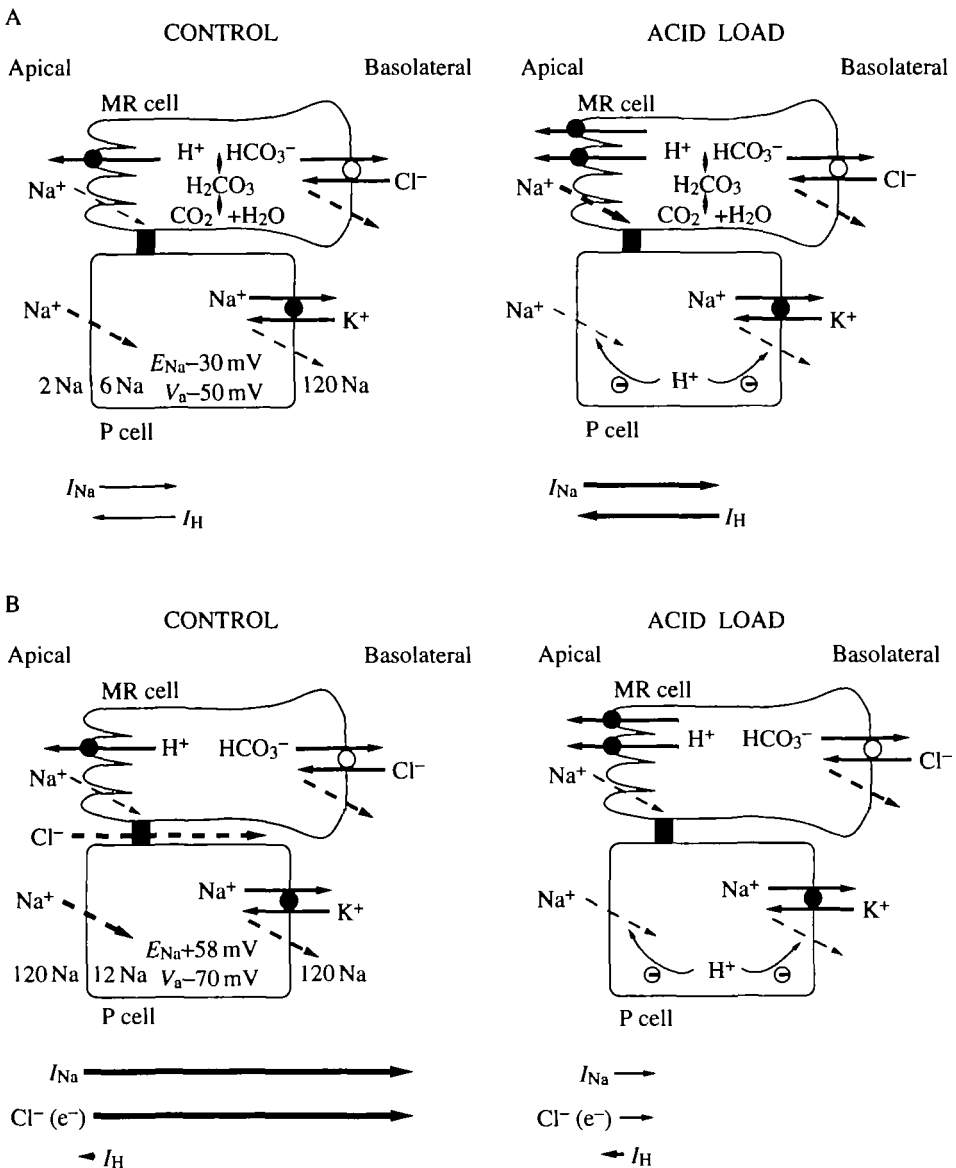

Fig. 1

was  $8 \times 10^{-18}$  equiv  $s^{-1}$ . At an imposed  $V_t$  of 100 mV, the DCCD-sensitive transepithelial current was  $10 \mu A cm^{-2}$ , equivalent to a transepithelial  $H^+$  secretion rate of  $373$  equiv  $h^{-1} cm^{-2}$ , which could be generated by  $1.3 \times 10^5$  fully activated MR cells per square centimetre of tissue (normally  $1 cm^2$  of frog skin contains approximately  $10^5$  MR cells). If the pump number correlates with the density of studs (200 000 per cell) associated with rod-shaped particles in MR cells of amphibian skin and urinary bladder (Brown *et al.* 1987b; Steinmetz and Stetson, 1987), then single-pump current is  $3.9 \times 10^{-17}$  A.

### Direct evidence for $Na^+$ channels in mitochondria-rich cells

A  $Na^+$  transport role for MR cells seems necessary to explain the stimulated  $J_{Na}$  during an acid load (in low external salinity, OCC) when  $Na^+$  uptake *via* principal cells is reduced by  $H^+$ -induced closure of  $Na^+$  channels. Investigations into sodium absorption by MR cells have led to conflicting conclusions, although there is a consensus that MR cells and P cells have specialized functions. An amiloride- and ouabain-sensitive swelling of MR cells has been demonstrated by video-image analysis in toad skin (Spring and Ussing, 1986; Larsen *et al.* 1987), which is consistent with the presence of apical  $Na^+$  channels and basolateral  $Na^+/K^+$ -ATPase. Electron microprobe elemental analysis of MR cells in frog skin (Rick *et al.* 1978; Dörge *et al.* 1989) failed to show significant changes in cellular  $Na^+$ ,  $K^+$  or  $Rb^+$  levels in response to diuretics, although recent microprobe data revealed that MR cells, which showed changes in  $Na^+$  content following ouabain and amiloride treatment, accounted for 50 % and 25 %, respectively, of the total MR cell

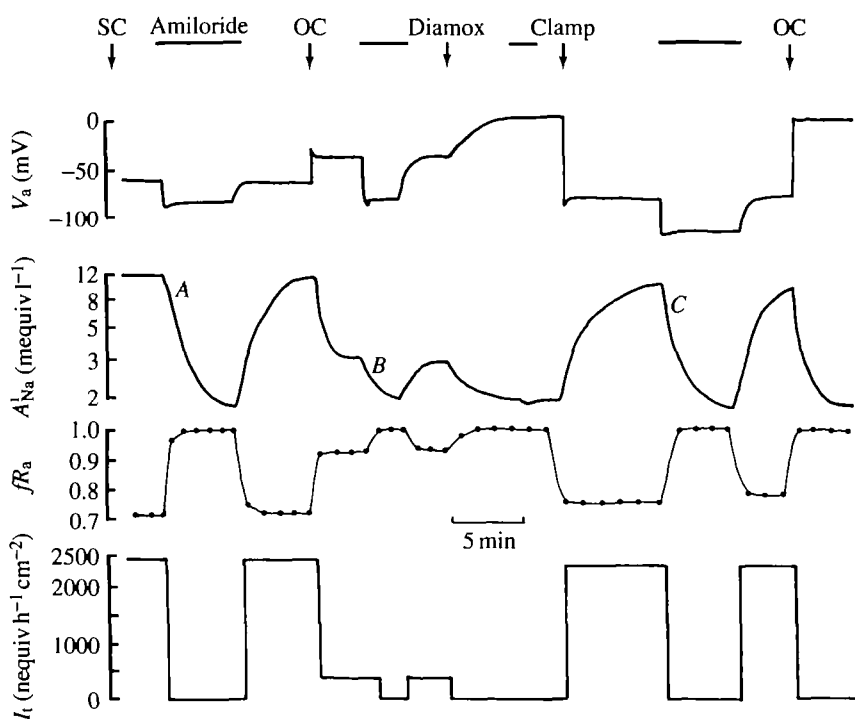

Fig. 2.

population (Rick, 1992). Microelectrode measurements of membrane potential in turtle urinary bladder and renal nephron intercalated cells do not support the hypothesis that these cells could constitute a major pathway for transepithelial  $\text{Na}^+$  uptake (Durham and Nagel, 1986; Koeppen, 1987; Bello-Reuss, 1991), but recent patch-clamp studies provide direct evidence for highly selective  $\text{Na}^+$  channels in apical membranes of frog skin MR cells (Harvey and Larsen, 1992).

Single MR cells maintain their shape and polarity when isolated from amphibian skin by collagenase treatment and membrane currents can be studied using the patch-clamp technique (Larsen and Harvey, 1992). Recordings of single-channel  $\text{Na}^+$ -selective currents ( $I_{\text{Na}}$ ) in an excised inside-out MR cell apical membrane of frog skin are shown in Fig. 5. The single-channel current-voltage (I-V) relationship was described by the Goldman-Hodgkin-Katz (GHK) equation for  $\text{Na}^+$  flux. The channel is highly selective for  $\text{Na}^+$  relative to  $\text{K}^+$  and has a single-channel chord conductance of 9 pS with 120 mmol l<sup>-1</sup>  $\text{Na}^+$  in the patch pipette and 12 mmol l<sup>-1</sup>  $\text{Na}^+$  in the bath perfusate. In symmetrical  $\text{Na}^+$  solutions (120 mmol l<sup>-1</sup>) the I-V relationship was linear and single-channel slope conductance was 3.6 pS. The GHK equation fitted to the I-V data yielded a value for the permeability selectivity coefficient,  $P_{\text{Na}}/P_{\text{K}}$ , of 35. Using this value, it is possible to determine the  $\text{Na}^+$  concentration of MR cells when the membrane potential is

Fig. 2. Pen recording of measurements of apical membrane potential ( $V_a$ ) and intracellular  $\text{Na}^+$  activity ( $A_{\text{Na}}^i$ ) in a frog skin principal cell obtained with a double-barrelled  $\text{Na}^+$ -sensitive microelectrode (for details see Harvey and Kernan, 1984) under conditions when  $\text{Na}^+$  absorption was uncoupled from proton secretion in short-circuit (SC) current, when  $J_{\text{Na}}$  ( $I_i$ ) and  $J_{\text{H}}$  were electrically coupled in open-circuit (OC), when  $J_{\text{H}}$  was inhibited by acetazolamide (Diamox) and when  $J_{\text{Na}}$  was activated by voltage-clamp during inhibition of  $J_{\text{H}}$  (Clamp). Apical membrane fractional resistance ( $fR_a$ ) and transepithelial  $\text{Na}^+$  current ( $I_i$ ) were calculated from changes in  $V_a$  and  $V_i$  produced by the amiloride-sensitive component of bipolar transepithelial current pulses required to clamp  $V_i$  at  $\pm 20$  mV for 200 ms duration (not shown). Apical solution, 55 mmol l<sup>-1</sup>  $\text{Na}_2\text{SO}_4$  buffered to pH 7.4 with 4 mmol l<sup>-1</sup> imidazole; serosal solution,  $\text{CO}_2/\text{HCO}_3^-$ -buffered Ringer, pH 7.4. Amiloride ( $10^{-5}$  mol l<sup>-1</sup>) was added to the apical superfusate during periods marked by solid bars and produced a hyperpolarization of  $V_a$ , a fall in  $A_{\text{Na}}^i$  and an increase in  $fR_a$  to unity due to block of apical  $\text{Na}^+$  channels. In SC conditions,  $J_{\text{Na}}$  is high and occurs essentially through P cells. This can be verified by comparing  $I_i$  with the instantaneous rate of decline in  $A_{\text{Na}}^i$  ( $\Delta A_{\text{Na}}^i$ ) after addition of amiloride. At A,  $I_i$  was 2490 nequiv h<sup>-1</sup> cm<sup>-2</sup> and  $\Delta A_{\text{Na}}^i$  was 13 mmol l<sup>-1</sup> min<sup>-1</sup>, which is equivalent to  $\text{Na}^+$  influx of 2260 nequiv h<sup>-1</sup> cm<sup>-2</sup> (epithelial volume/surface = 2.9  $\mu\text{l cm}^{-2}$ ). When the tissue was abruptly changed from SC conditions to OC conditions,  $J_{\text{Na}}$  was instantaneously reduced, since it becomes rate-limited by the requirement for charge balance provided by  $\text{H}^+$  secretion.  $A_{\text{Na}}^i$  decreases and  $fR_a$  is increased as less  $\text{Na}^+$  enters the P cell. Under these conditions, when  $J_{\text{Na}}$  and  $J_{\text{H}}$  are coupled,  $\text{Na}^+$  uptake still occurs essentially through principal cells as verified by  $\Delta A_{\text{Na}}^i$  measured at B: 3 mmol min<sup>-1</sup> or 520 nequiv h<sup>-1</sup> cm<sup>-2</sup> (compared with  $I_i$  = 500 nequiv h<sup>-1</sup> cm<sup>-2</sup>). Addition of the carbonic anhydrase inhibitor diamox ( $10^{-4}$  mol l<sup>-1</sup>) to the apical superfusate under OC conditions produced membrane depolarization, a fall in  $A_{\text{Na}}^i$ , an increase in  $fR_a$  and a reduction in transepithelial  $\text{Na}^+$  absorption. Amiloride had no additional effect on these transport parameters indicating that net  $\text{Na}^+$  entry through the P cell was completely abolished. Voltage-clamping the epithelium to a  $V_i$  of 100 mV produced a recovery in  $A_{\text{Na}}^i$  and  $fR_a$ . In this situation when  $J_{\text{H}}$  is inhibited, the voltage-driven  $J_{\text{Na}}$  passes through the P cell and at C the  $\Delta A_{\text{Na}}^i$  was 14 mmol min<sup>-1</sup> (2440 nequiv h<sup>-1</sup> cm<sup>-2</sup> equivalent to  $I_i$ ).

clamped to 0 mV by high external  $K^+$  ( $120 \text{ mmol l}^{-1}$ ). Under these conditions, the  $I_{Na}$  reversal potential is equal to the Nernst potential for  $Na^+$  and the GHK fit to single-channel  $Na^+$  currents in intact cells gives  $E_{Na}$  of 50 mV and  $[Na^+]_i$  of  $16 \text{ mmol l}^{-1}$ .

Another approach for detecting  $Na^+$  channels in MR cells uses the whole-cell patch-clamp configuration. In this case, MR cells are patch-clamped *in situ* from the basolateral side of an intact epithelium mounted in an Ussing chamber. This experimental design has the advantage of maintaining functional polarity of the cells and allowing asymmetrical

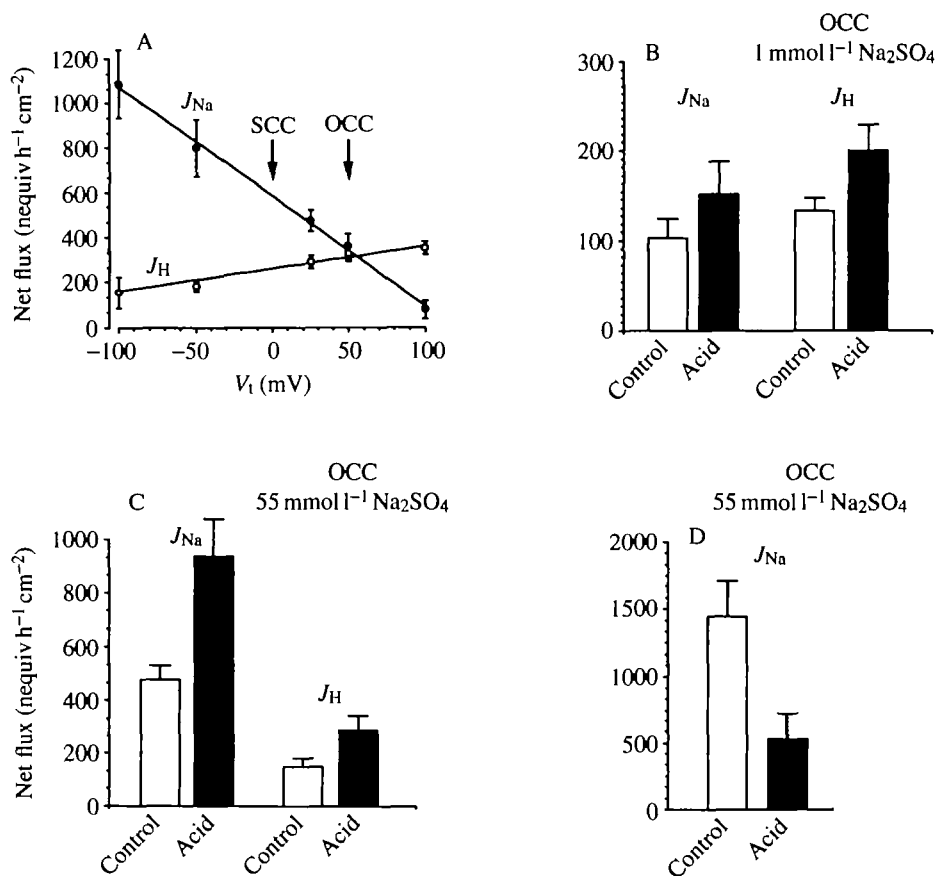

Fig. 3. (A) Relationship between net active  $H^+$  secretion ( $J_H$ ) and  $Na^+$  absorption ( $J_{Na}$ ) in isolated frog skin (bathed in  $1 \text{ mmol l}^{-1} Na_2SO_4$  solution on the apical side and  $CO_2/HCO_3^-$ -buffered Ringer's solution on the serosal side) at different imposed transepithelial electrical potentials ( $V_t$ ).  $J_{Na}$  and  $J_H$  show opposite dependence on  $V_t$ . Hyperpolarization of the epithelium (serosa negative) reduces  $J_H$  and increases  $J_{Na}$ . Note that  $J_{Na}$  and  $J_H$  are equal only in open-circuit conditions (OCC). (B) Stimulation of  $J_{Na}$  and  $J_H$  by an acid load under open-circuit conditions from a  $1 \text{ mmol l}^{-1} Na_2SO_4$  solution. (C) Stimulatory effect of an acid load on  $J_{Na}$  and  $J_H$  under open-circuit conditions in an apical  $55 \text{ mmol l}^{-1} Na_2SO_4$  solution. (D) The same ionic gradients as in C but under short-circuit conditions (SCC), where an acid load inhibits  $Na^+$  absorption. Acid loads were created by application of 5%  $CO_2$  to the apical side in C and D or by loading with  $15 \text{ mmol l}^{-1} NH_4Cl$  from the serosal side in B. (Data from Harvey and Ehrenfeld, 1988a.) Bars show mean  $\pm$  S.E.



application of transport inhibitors or activators. Whole-cell voltage-clamp of MR cells *in situ* is possible since these cells are chemically and electrically uncoupled from neighbouring principal cells (Farquhar and Palade, 1964; Rosen and Friedley, 1973; Rick *et al.* 1978; Ilic and Brown, 1980; Kristensen and Ussing, 1985; Spring and Ussing,

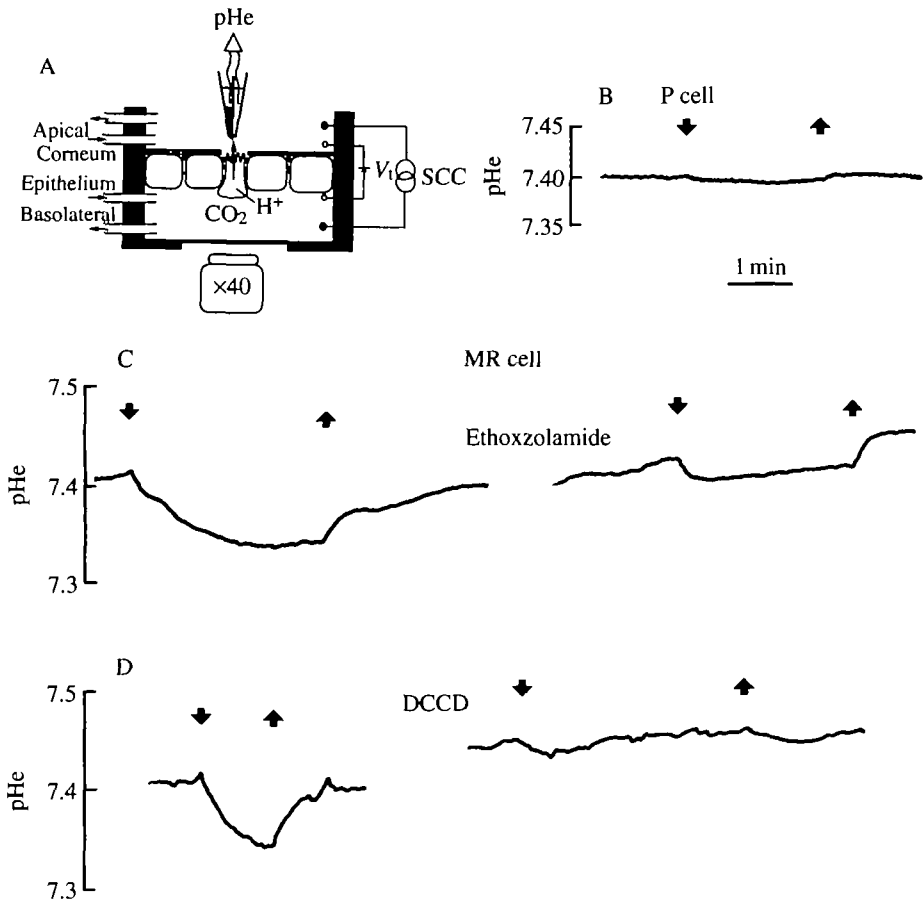

Fig. 4. Direct evidence for voltage-dependent  $H^+$ -ATPase pumps located in apical membranes of mitochondria-rich cells in isolated epithelia. (A) Schematic representation of experimental set-up to measure external pH (pHe) changes with double-barrelled pH-sensitive microelectrodes positioned  $0.2 \mu m$  above an MR cell in response to a transepithelial voltage-clamp. Apical solution,  $1 mmol l^{-1}$   $Na_2SO_4$  buffered to pH 7.4 with  $4 mmol l^{-1}$  imidazole; serosal solution, 5%  $CO_2/24 mmol l^{-1}$   $HCO_3^-$ -buffered Ringer, pH 7.4. The epithelium was voltage-clamped at  $-100 mV$  to reduce (or reverse) electrogenic  $J_H$  and stepped to  $+100 mV$  (during periods marked by arrows in the accompanying pen recordings of pHe) to stimulate  $J_H$ . In B pHe was unchanged by voltage-clamp when the pH microelectrode was positioned  $0.2 \mu m$  above the stratum corneum over a principal cell. In C and D the electrode was positioned over an MR cell. Voltage-clamping the tissue to  $+100 mV$  produced a reversible external acidification which was reduced in C by the carbonic anhydrase inhibitor ethoxzolamide ( $10^{-4} mol l^{-1}$ ). In D, application of  $10^{-5} mol l^{-1}$  dicyclohexylcarbodiimide (DCCD) to the apical bath prevented the voltage-induced external acidification above an MR cell.

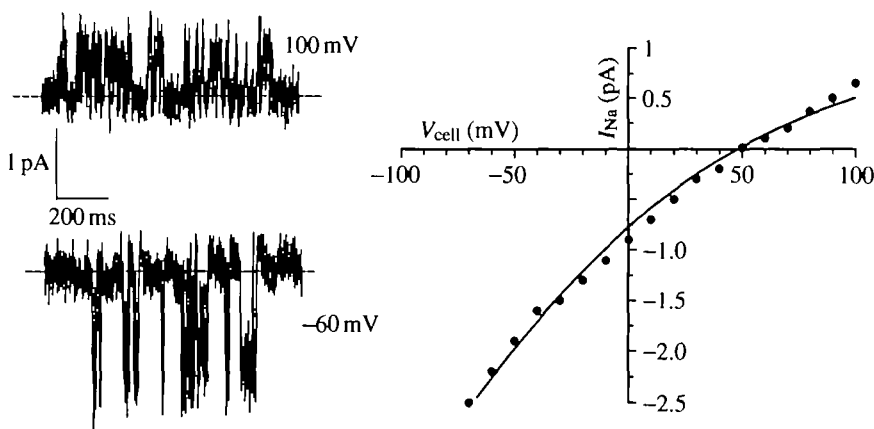

Fig. 5. Patch-clamp recording of single  $\text{Na}^+$  channel activity in a patch excised from the apical membrane of an isolated MR cell. The patch pipette was filled with (in  $\text{mmol l}^{-1}$ )  $\text{NaCl}$ , 120;  $\text{BaCl}_2$ , 5;  $\text{KCl}$ , 2;  $\text{MgCl}_2$ , 1;  $\text{CaCl}_2$ , 2; Hepes, 10; pH 7.4 and the bath (cytosolic side) contained  $\text{NaCl}$ , 12;  $\text{KCl}$ , 104;  $\text{CsCl}$ , 4;  $\text{MgCl}_2$ , 1.17;  $\text{CaCl}_2$ , 2.96; EGTA, 5 ( $100 \text{ nmol l}^{-1}$  free  $\text{Ca}^{2+}$ ); Hepes, 10; pH 7.4. Single-channel current records are shown in A at two membrane potentials, +100 mV and -60 mV. The closed state is shown by the dashed line. Upward current deflections signify  $\text{Na}^+$  moving across the membrane from the cytosolic side into the patch pipette. The single-channel current-voltage relationship is given in B. Fitting the Goldman-Hodgkin-Katz equation to the I-V data (solid line through data points) gave values for single-channel chord conductance,  $g$ , of 9 pS and a selectivity ratio,  $P_{\text{Na}}/P_{\text{K}}$ , of 35:1.

1986). Amiloride-sensitive apical membrane current-voltage relationships ( $I_a - V_a$ ) can be recorded from MR cells (in which  $\text{K}^+$  and  $\text{Cl}^-$  currents were eliminated by  $\text{Ba}^{2+}$ ,  $\text{Cs}^+$  and ionic substitution) by subtraction of whole-cell I-V relationships recorded in the absence and the presence of  $5 \mu\text{mol l}^{-1}$  apical amiloride (B. J. Harvey and E. H. Larsen, unpublished results). The almost ideal fit of the GHK equation for  $\text{Na}^+$  flux to  $I_a - V_a$  relationships provides firm evidence that the MR cell apical membrane possesses  $\text{Na}^+$  channels. Fluctuation analysis of amiloride-sensitive whole-cell current yields estimates of single-channel conductance and the number of  $\text{Na}^+$  channels in the MR cell apical membrane (Fig. 6). Power density spectra were fitted by a single Lorentzian function which describes whole-cell noise generated by a homogeneous population of fluctuating ion channels. The voltage-dependence of amiloride-sensitive noise shows minima at  $E_{\text{Na}}$ , as expected for current fluctuations generated by openings and closures of  $\text{Na}^+$  channels. The low conductance and high  $\text{Na}^+/\text{K}^+$  selectivity of  $\text{Na}^+$  channels in MR cells resembles quite closely the biophysical characteristics of patch-clamped  $\text{Na}^+$  channels in principal cells (Palmer and Frindt, 1986). The  $\text{Na}^+$  channel density of 450 channels per MR cell or  $45 \times 10^6$  channels per  $\text{cm}^2$  tissue (for  $10^5$  MR cells per  $\text{cm}^2$ ) is in the range  $17 \times 10^6$ – $77 \times 10^6$  channels per  $\text{cm}^2$  estimated by noise analysis in amphibian skin (van Driessche and Zeiske, 1985). It is theoretically possible for MR cells to account for all of  $J_{\text{Na}}$ . However, MR whole-cell  $\text{Na}^+$  currents and channel density are five times smaller than in granular cells (Harvey and Larsen, 1992), which constitute a high-capacity and syncytial route for  $\text{Na}^+$  absorption. The sensitivity of both MR and P cell  $\text{Na}^+$  channels to cytosolic  $\text{H}^+$

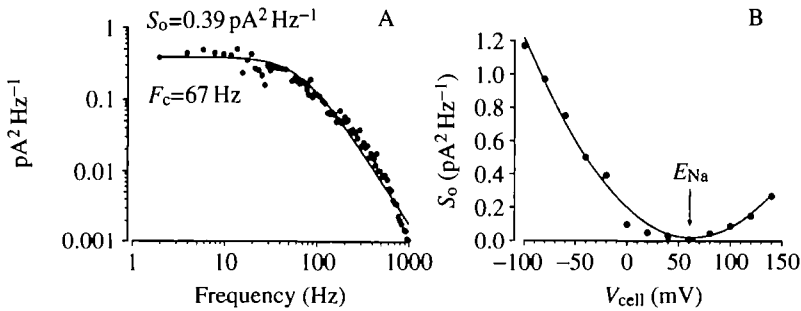

Fig. 6. Stationary fluctuation analysis of MR cell  $\text{Na}^+$  currents recorded from an isolated MR cell in whole-cell patch-clamp configuration. The bath contained (in  $\text{mmol l}^{-1}$ ) sodium acetate, 120;  $\text{BaCl}_2$ , 5;  $\text{KCl}$ , 2;  $\text{MgCl}_2$ , 1;  $\text{CaCl}_2$ , 2; Hepes, 10; (pH 7.4); DCCD,  $10^{-4}$  and the patch pipette was filled with  $\text{NaCl}$ , 5.7; sodium gluconate, 6.3; potassium gluconate, 104;  $\text{CsCl}$ , 4;  $\text{MgCl}_2$ , 1.17;  $\text{CaCl}_2$ , 2.96; EGTA, 5 ( $100 \text{ nmol l}^{-1}$  free  $\text{Ca}^{2+}$ ); Hepes, 10 (pH 7.4); and  $\text{GTP}\gamma\text{S}$   $10 \mu\text{mol l}^{-1}$ . (A) Power density spectrum (PDS) of whole-cell noise recorded at a pipette (cell) voltage  $V_p$  of  $-25 \text{ mV}$ . The PDS was fitted by a single Lorentzian function, which is indicative of the presence of spontaneously fluctuating channels. A single-channel chord conductance,  $g_s$ , of  $8.45 \text{ pS}$  was calculated from the Lorentzian plateau of  $0.39 \text{ pA}^2 \text{ s}^{-1}$  MR cell, the corner frequency,  $f_c$  of  $67 \text{ Hz}$  and the single  $\text{Na}^+$  channel open probability,  $P_o$ , of  $0.25$  (measured in excised patches under similar electrochemical gradients as used in the whole-cell recordings). These data and the measured noise variance of  $41 \text{ pA}^2$ , Nernst potential  $E_{\text{Na}}$  of  $58 \text{ mV}$  and membrane current  $I_m$  of  $78 \text{ pA}$  at  $V_p$  of  $25 \text{ mV}$  were used to calculate a single-channel  $\text{Na}^+$  current of  $0.7 \text{ pA}$  and a density of  $4.46 \text{ Na}^+$  channels per MR cell. The ion-selectivity of the channel that generates the spontaneous whole-cell noise was evaluated by examining the voltage-dependence of the plateau Lorentzian function. The relationship between  $S_0$  (see below) and  $V_{\text{cell}}$  is shown in B and displays a minimum at a  $V_{\text{cell}}$  of  $60 \text{ mV}$ . Since  $\text{Na}^+$  is the only ion with a reversal potential close to this value, it can reasonably be concluded that the whole-cell noise is generated by spontaneously fluctuating  $\text{Na}^+$  channels. **Whole-cell current noise analysis.** The whole-cell configuration was obtained from the cell-attached mode after breaking the membrane patch by applying a brief negative pressure pulse ( $-2 \times 10^3 \text{ N m}^{-2}$ ) in the pipette. Patch pipettes were coated with Sylgard to reduce stray capacitance through the glass wall. Whole-cell current fluctuations were amplified (RK300 Biologic, Claix, France), digitized (A/D converter CED 1401, Cambridge Electronic Design, UK) and sampled in real time on a computer hard disk at an acquisition rate of  $2 \text{ kHz}$ . The noise signal was split into low- and high-pass filtered components with cut-off frequencies at  $1 \text{ kHz}$  and  $0.1 \text{ Hz}$ , respectively. The filtered signals were analysed by a fast Fourier transform using the SPAN program (J. Dempster, Strathclyde Electrophysiology Software, Scotland). The variance of the fluctuations in current noise is presented as a function of the a.c. frequencies contained in the current noise (power density spectra). An average power spectrum was compiled from 200 record segments (each of  $250 \text{ ms}$  duration). Channel noise was recorded at pipette holding potentials between  $+150 \text{ mV}$  and  $-100 \text{ mV}$ . Background or channel-free noise was recorded in the presence of a saturating concentration of the inhibitor amiloride. A Lorentzian curve was fitted to the power spectrum using a Levenberg-Marquadt iterative fitting algorithm. For a channel that fluctuates between distinct open and closed states, the power spectrum will contain a Lorentzian defined by the equation:  $L(f) = S_0 / [1 + (f/f_c)^2]$ , where  $S_0$  is the low-frequency asymptote or plateau value and  $f_c$  is the corner or cut-off frequency at which the spectral power is  $S_0/2$ . The variance in channel current noise ( $\sigma^2$ ) was calculated by integrating the power spectrum  $\sigma^2 = (\pi > f_c S_0)/2$  and the single-channel conductance ( $g_s$ ) was then determined from  $g_s = \sigma^2 / [I_m(V_p - E_r) \times (1 - P_o)]$ , where  $I_m$  is the mean d.c. current recorded in the power spectrum,  $V_p$  is the pipette holding voltage,  $E_r$  is the reversal potential and  $P_o$  the open-channel probability. Single-channel current ( $I_s$ ) can then be obtained from  $I_s = g_s(V_p - E_r)$ . The channel density ( $N$ ) was estimated from:  $N = \pi f_c S_0 / 2 I_s^2 P_o (1 - P_o)$ .

(Harvey *et al.* 1988; B. J. Harvey and E. H. Larsen, unpublished results) and the  $\text{CO}_2$ -activation of  $J_{\text{H}}$ -coupled  $J_{\text{Na}}$  implies that MR cell  $\text{Na}^+$  channels are protected against an acid load. This protection could be achieved by the dynamic buffering power of carbonic anhydrase-catalysed hydration of  $\text{CO}_2$ . The high rate of  $\text{H}^+$  secretion through the  $\text{H}^+$  pump and the  $\text{CO}_2$ -induced exocytotic insertion of pumps may also contribute to a rapid regulation of intracellular (pHi) (Cohen and Steinmetz, 1980; van Adelsberg and Al-Awqati, 1986).

### Counting proton pumps in single MR cells

The  $\text{H}^+$ -ATPase pump of epithelia is thought to be composed of a cytoplasmic domain catalytic subunit and an intramembranous proton channel linked by an antechamber of high buffering power (Andersen *et al.* 1985; Steinmetz, 1988). This structure is analogous to that envisaged for V-ATPases and F-ATPases (Sebald *et al.* 1982; Senior and Wise, 1983; Gluck and Caldwell, 1988; Forgac, 1989; Futai *et al.* 1989). The rheogenic nature of proton secretion and its passage through a proton channel in the apical membrane opens the possibility of applying whole-cell patch-clamp recording to detect  $\text{H}^+$  pump current fluctuations. Using DCCD as a probe for the proton channel (Solioz, 1984), power density spectra were constructed from  $\text{CO}_2$ -induced noise in single MR cells *in situ*, in which conductive movements of  $\text{Na}^+$ ,  $\text{K}^+$  and  $\text{Cl}^-$  were eliminated (Fig. 7). Electrical access to the whole-cell membrane was achieved by perforating the membrane patch in cell-attached mode with the ionophore amphotericin B in the patch pipette. This technique (Horn and Marty, 1988) provides a low electrical resistance access to the cell while, presumably, maintaining metabolism and the cytoskeleton intact. (Horn and Marty used nystatin to perforate rat lacrimal gland cells; lower access resistance is achieved with amphotericin B in MR cells). Current fluctuations induced in MR cells by increasing  $P_{\text{CO}_2}$  in the serosal bath could be fitted by a single Lorentzian function, indicative of the presence of a homogeneous population of spontaneously fluctuating channels. The concomitant disappearance of the Lorentzian noise component and transepithelial  $\text{H}^+$  current when DCCD was added to the apical bath strongly suggest that the whole-cell current fluctuations originate from spontaneously fluctuating proton channels in the apical membrane. Changing from  $\text{CO}_2$ -free to 5%  $\text{CO}_2$  medium produced a threefold increase in the calculated number of  $\text{H}^+$  pumps in the membrane accompanied by a 27% increase in single-pump current. The voltage-dependence of the Lorentzian plateau showed minima at membrane potentials of approximately  $-170$  mV, which is in reasonable agreement with measured transepithelial voltages (130–210 mV) required to halt or reverse  $J_{\text{H}}$  (Dixon and Al-Awqati, 1979, 1980; Andersen *et al.* 1985; Ehrenfeld *et al.* 1985).

Aldosterone stimulates  $\text{H}^+$  secretion in amphibian skin and urinary bladder and in rat colon (Ludens and Fanestil, 1974; Al-Awqati *et al.* 1976; Perrone *et al.* 1990), activates  $\text{H}^+$ -ATPase activity in renal collecting tubule (Mujais, 1987; Khadouri *et al.* 1989), selectively binds to MR cells (Sapirstein and Scott, 1975) and changes their morphology (Voûte *et al.* 1972). In the presence of 5%  $\text{CO}_2/24 \text{ mmol l}^{-1} \text{ HCO}_3^-$ , aldosterone produced an additional stimulation of DCCD-sensitive apical membrane current

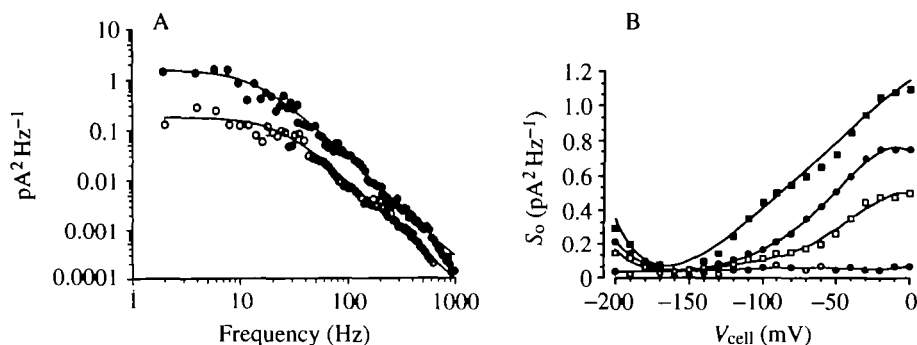

Fig. 7. Noise analysis of CO<sub>2</sub>- and aldosterone-treated single MR cells. Membrane current fluctuations were recorded using the perforated whole-cell patch-clamp configuration. The experimental arrangement and solutions are described in detail in Fig. 8. (A) Power density spectra recorded in CO<sub>2</sub>-free (○) and in 5% CO<sub>2</sub>/24 mmol l<sup>-1</sup> HCO<sub>3</sub><sup>-</sup> (●) Ringer's solution are shown for the same MR cell voltage-clamped at 100 mV. In CO<sub>2</sub>-free solutions ( $N=9$ ),  $S_0=0.18\pm0.011$  pA<sup>2</sup> Hz<sup>-1</sup> and  $f_c=22.4\pm2.4$  Hz. Single-pump current ( $I_p$ ) was 0.166 pA and the number of pumps,  $N$  was 602 pumps per MR cell. In 5% CO<sub>2</sub> solutions ( $N=9$ ),  $S_0=1.057\pm0.099$  pA<sup>2</sup> Hz<sup>-1</sup>,  $f_c=13.5\pm1.19$  Hz,  $I_p=0.21$  pA,  $N=7695$  pumps per MR cell (assuming  $P_0=0.9$ ). In aldosterone-treated cells ( $N=9$ ),  $S_0=1.3\pm0.4$  pA<sup>2</sup> Hz<sup>-1</sup>,  $f_c=44.3\pm2.5$  Hz,  $I_p=0.299$  pA and  $N=11\,129$  pumps per MR cell. (B) Voltage-dependence of PDS plateau Lorentzian functions in the presence of apical (10<sup>-5</sup> mol l<sup>-1</sup>) DCCD (□), CO<sub>2</sub>-free Ringer's (○), 5% CO<sub>2</sub> (●) and aldosterone in presence of 5% CO<sub>2</sub> (■). The minimum Lorentzian plateau  $S_0$  for the latter three conditions was recorded at a  $V_{cell}$  of -170 mV.

fluctuations in single MR cells (Fig. 7B) and a 150% increase in the calculated number of H<sup>+</sup> pumps, without significantly affecting single-pump current. From electron micrographs, the MR cell apical area is approximately 12.5 μm<sup>2</sup> and the density of proton pumps in CO<sub>2</sub> is approximately 600 μm<sup>-2</sup>. Since MR cells account for approximately 10% of tissue area, this calculation yields a proton current of 12 μA cm<sup>-2</sup>, which is equivalent to measured rates of transepithelial H<sup>+</sup> secretion (350 nequiv h<sup>-1</sup> cm<sup>-2</sup>).

The single-pump current calculated from noise analysis is about 500 times greater than that estimated from titration and morphological data. This could be explained if H<sup>+</sup> pumps functioned in clusters, and their distribution over the membrane was non-uniform.

### CO<sub>2</sub>- and aldosterone-stimulated exocytosis in single MR cells

Exocytosis of cytosolic vesicles into plasma membranes can be a rapid means of increasing the transport capacity of a cell (Almers, 1990; Schaerer *et al.* 1991). CO<sub>2</sub> stimulates H<sup>+</sup> secretion in turtle urinary bladder (Schwartz and Steinmetz, 1971) by rapid insertion of vesicles containing preformed V-ATPase holoenzymes into the luminal membrane (Gluck *et al.* 1982; Stetson and Steinmetz, 1983, 1986; Brown *et al.* 1987a; Steinmetz, 1988). This phenomenon has also been described as a mechanism controlling acid secretion in renal tubule (Schwartz and Al-Awqati, 1985). The exocytotic event is dependent on changes in cell pH and calcium concentration (Cannon *et al.* 1985; van Adelsberg and Al-Awqati, 1986; Arruda *et al.* 1988, 1990), although the role of

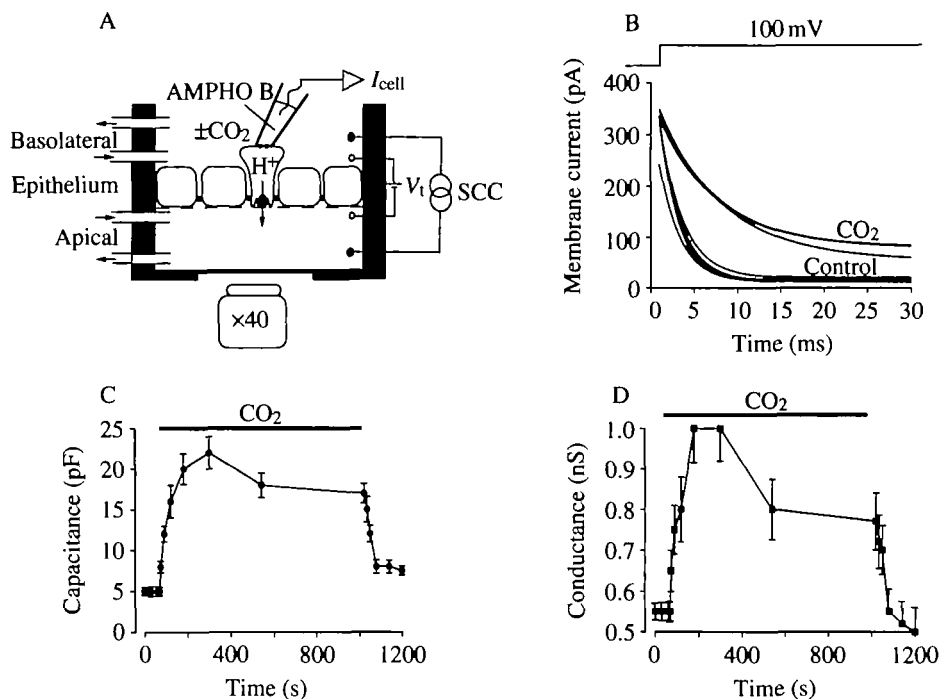

Fig. 8. Exocytosis induced by carbon dioxide and quantified from measurements of membrane capacitance in single MR cells *in situ*. A diagram of the experimental arrangement is shown in A. The isolated epithelium was mounted in a miniature Ussing chamber on the stage of an inverted Leitz microscope and viewed at  $\times 40$  magnification. The basolateral membranes of MR cells *in situ* were exposed by collagenase treatment and the slow whole-cell configuration of the patch-clamp technique was used to record MR cell membrane capacitative current transients (Lindau and Neher, 1988). The patch membrane was perforated by adding the ionophore amphotericin B oxcholate (final concentration  $40 \mu\text{g ml}^{-1}$ ) to the patch pipette solution which contained (in  $\text{mmol l}^{-1}$ ) potassium gluconate, 104; acetate, 3; pyruvate, 5; L-aspartic acid, 5; KCl, 20;  $\text{MgCl}_2$ , 1;  $\text{CaCl}_2$ , 1; EGTA, 10; ATP, 3; Hepes, 10 (pH 7.2) and  $100 \mu\text{mol l}^{-1}$  ADP;  $10 \mu\text{mol l}^{-1}$  GTP $\gamma\text{S}$ . The serosal bath was NaCl Ringer containing  $5 \text{ mmol l}^{-1}$   $\text{BaCl}_2$  and equilibrated in  $\text{CO}_2$ -free air (pH 7.4) or gassed in 5%  $\text{CO}_2/24 \text{ mmol l}^{-1}$   $\text{HCO}_3^-$  (pH 7.4). The apical side was superfused with  $1 \text{ mmol l}^{-1}$   $\text{MgSO}_4$ ,  $4 \text{ mmol l}^{-1}$  imidazole (pH 7.4). Membrane capacitance was calculated from the time constant ( $\tau$ ) of decay in capacitative membrane currents immediately following a step in pipette voltage ( $V_p$ ) from 0 to +100 mV. The change in whole-cell clamp current in the time domain ( $I_c$ ) was fitted by  $I_c = (I_{\text{max}} - I_{\text{min}}) \exp(-t/\tau) + I_{\text{min}}$ . Since the membrane pipette seal resistance ( $>50 \text{ G}\Omega$ ) is much larger than the access resistance ( $R_a \approx 300 \text{ M}\Omega$ ) of the patch membrane,  $R_a$  can be calculated from  $V_p/I_{\text{max}}$  and membrane conductance  $G_m = I_{\text{min}}/(V_p - R_a/I_{\text{min}})$  and membrane capacitance from  $C_m = \tau > (1/R_a + G_m)$ . Twenty consecutive  $I_c$  transients were recorded and averaged for a single determination of  $C_m$ . Pulse duration was  $\tau \times 10 \text{ ms}$  at 100 ms intervals and an entire run took on average 4 s. The  $I_c$  signals were recorded using a patch-clamp amplifier (Biologic RK300, Claix, France) with cut-off Bessel filter set at 5 kHz and digitized at 10 kHz (Cambridge Electronic Design CED1401 A/D converter) and stored by computer for analysis. (B) Membrane current transients recorded from a single perforated whole MR cell following voltage-clamp from 0 to +100 mV pipette (cell) positive. Four consecutive membrane capacitance transients (each an average response to 20 voltage pulses) are shown for  $\text{CO}_2$ -free and 5%  $\text{CO}_2$  conditions. The rate of decay in whole-cell clamp current is slower in  $\text{CO}_2$  (signifying increased capacitance). (C) MR cell membrane capacitance and (D) conductance before, during and after exposure to 5%  $\text{CO}_2$  ( $N=10$  cells). An intracellular acid load reversibly stimulated both exocytosis and conductance.

intracellular acidification *per se* in  $\text{CO}_2$ -induced  $J_{\text{H}}$  has been convincingly challenged (Adrogué *et al.* 1987). A dynamic control of acid secretion may be achieved by exocytotic insertion and endocytotic retrieval of V-ATPase pumps (Al-Awqati *et al.* 1983; Reeves *et al.* 1983; Schwartz and Al-Awqati, 1986; Dixon *et al.* 1986, 1988; Stetson, 1989). Exocytosis increases cell membrane area, which can be recorded as an increase in cell membrane electrical capacitance (Clausen and Dixon, 1986; Rich *et al.* 1990). Measurements of single-cell membrane capacitance ( $C_{\text{m}}$ ) and exocytotic rates can be reliably made in the whole-cell patch-clamp recording configuration (Horn and Marty, 1988; Lindau and Neher, 1988). The application of this technique to single MR cells *in situ* is shown in Fig. 8. Superfusion of an MR cell in 5%  $\text{CO}_2$ -buffered Ringer's solution induces a rapid and reversible increase in membrane capacitance ( $C_{\text{m}}$ ) from  $4.6 \pm 10.7$  pF to  $22 \pm 11.5$  pF with a half-time for maximum change in  $C_{\text{m}}$  of  $37 \pm 16$  s ( $N=10$ ). The changes in MR cell membrane area and apical membrane DCCD-sensitive conductance occurred simultaneously, demonstrating that the newly inserted membrane contained functional  $\text{H}^+$  pumps. This result correlates well with an enhanced acid-secreting capacity of the epithelium with DCCD-sensitive transepithelial current increasing from  $4.6 \mu\text{A cm}^{-2}$  ( $172 \text{ nequiv h}^{-1} \text{ cm}^{-2}$ ) in  $\text{CO}_2$ -free medium to  $15.7 \mu\text{A cm}^{-2}$  ( $584 \text{ nequiv h}^{-1} \text{ cm}^{-2}$ ) in 5%  $\text{CO}_2$ .

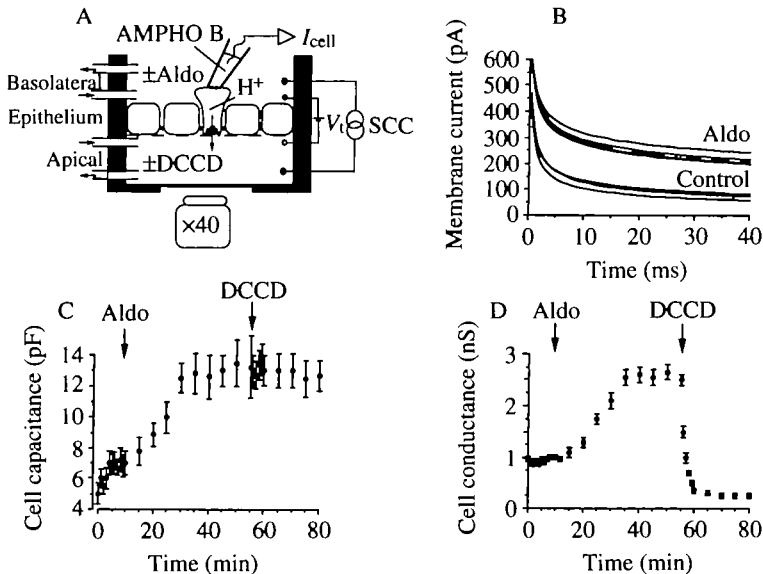

Fig. 9. Effects of aldosterone ( $10 \text{ nmol l}^{-1}$ ) on membrane capacitance and conductance of amphotericin-perforated MR cells which had been exposed to 5%  $\text{CO}_2/24 \text{ mmol l}^{-1} \text{ HCO}_3^-$  Ringer's solution for 2 h. The experimental set-up is shown in A and bath/pipette solutions are similar to those used for the  $\text{CO}_2$ -induced exocytosis experiments. (B) Recording of 80 averaged membrane current transients in control and after aldosterone (30 min). Both the time constant and d.c. whole-cell current were increased by hormone treatment. (C) The response of cell capacitance and (D) conductance to aldosterone ( $N=6$  cells). The hormone triggers insertion of membrane with conductive properties. Addition of DCCD ( $10^{-5} \text{ mol l}^{-1}$ ) to the apical bath reduced membrane conductance without affecting membrane capacitance.

A similar approach was used to investigate the mechanism of aldosterone-stimulated  $H^+$  secretion in frog skin (Fig. 9). Aldosterone produces a slow increase in membrane capacitance and conductance of single MR cells (half-time 12 min). The conductance, but not the capacitance, was reduced by DCCD applied to the apical side, which indicates that aldosterone induces the insertion of new membrane containing functional  $H^+$  pumps into the apical membrane. DCCD acts as a blocker of proton current without affecting exocytosis/endocytosis. Aldosterone and  $CO_2$ -induced exocytosis are additive but mutually independent. How the hormone increases the activity of the membrane shuttle is at present unknown.

### **Energization of $Cl^-$ transport by the proton pump**

Besides their proton secretion function, there is evidence that MR cells are the site of passive apical  $Cl^-/HCO_3^-$  exchange (Ehrenfeld and Garcia-Romeu, 1978).  $Cl^-$  absorption/base secretion may not involve the alpha-type proton-secreting MR cell but rather a base-secreting MR cell similar to the beta-type intercalated cell in turtle urinary bladder and renal collecting tubule (Stetson and Steinmetz, 1985; Schwartz *et al.* 1985; Brown *et al.* 1988b). A concentration- and voltage-dependent  $Cl^-$  conductive uptake pathway has also been attributed to amphibian MR cells (Larsen and Rasmussen, 1982; Willumsen and Larsen, 1986; Katz *et al.* 1985; Katz and Scheffey, 1986; Nagel and van Driessche, 1991). Although this claim is currently a matter of contention (Dörge *et al.* 1988), recent whole MR cell patch-clamp studies provide direct evidence for voltage-gated  $Cl^-$  currents (Larsen and Harvey, 1992), which may involve a novel gamma-type MR cell (Larsen, 1991). If  $Cl^-$  channels are inactivated in gamma-type MR cells exposed to low external  $Cl^-$  concentration, the parallel operation of  $H^+$ -ATPase pumps and  $Cl^-/HCO_3^-$  exchange will produce an apparent rheogenic transepithelial  $Cl^-$  absorption (Larsen *et al.* 1992). The possibility that proton pumps in MR cells energize  $Na^+$  and  $Cl^-$  absorption from dilute solutions *in vivo* is given added support from the positive correlation between  $Na^+$  and  $Cl^-$  absorption rates and MR cell number (Ehrenfeld *et al.* 1990; Devuyst *et al.* 1991).

### **Conclusions and perspectives**

The V-ATPase in mitochondria-rich cells appears to be a major determinant of sodium absorption through principal cells of amphibian skin *in vivo* or *in vitro* in the absence of transepithelial anion flux. The apparent 1:1 coupling between  $J_{Na}$  and  $J_H$  results from the equilibrium of circular current flow across the epithelium and is a manifestation of Kirchhoff's current law. An acid load produces closure of apical  $Na^+$  channels in principal cells and the MR cells provide an alternative cellular pathway for acid-stimulated amiloride-sensitive  $Na^+$  uptake.

Patch-clamp studies, as described here, of membrane conductance and capacitance of MR cells *in situ* in a polarized and functional epithelium offer unique opportunities to discover the mechanisms of ion transport regulation modulated by acid-base and hormonal challenges. This tool could also be used to probe further the analogy between



proton channels and antidiuretic hormone water channels (Harris *et al.* 1991; Harvey *et al.* 1991).

### References

- ADROGUÉ, H., TASBY, J. AND ULATE, G. (1987). Marginal effect of changes in acid–base status *in vitro* on rheogenic  $H^+$  and  $HCO_3^-$  secretion in turtle urinary bladder. *Renal Physiol.* **10**, 69–84.
- AL-AWQATI, Q. (1986). Proton-translocating ATPases. *A. Rev. Cell Biol.* **2**, 179–199.
- AL-AWQATI, Q., GLUCK, S., REEVES, W. AND CANNON, C. (1983). Regulation of proton transport in urinary epithelia. *J. exp. Biol.* **106**, 135–141.
- AL-AWQATI, Q., NORBY, L. W., MUELLER, A. AND STEINMETZ, P. R. (1976). Characteristics of stimulation of  $H^+$  transport by aldosterone in turtle urinary bladder. *J. clin. Invest.* **58**, 351–358.
- ALMERS, W. (1990). Exocytosis. *A. Rev. Physiol.* **52**, 607–627.
- ANDERSEN, O. S., SILVEIRA, J. E. N. AND STEINMETZ, P. R. (1985). Intrinsic characteristics of the proton pump in the luminal membrane of a tight urinary epithelium. The relation between transport rate and electrochemical potential difference of the proton. *J. gen. Physiol.* **86**, 215–234.
- ARRUDA, J. A. L., DYTOKO, G. AND TAYLOR, Z. (1990). Stimulation of  $H^+$  secretion by  $CO_2$  in turtle bladder: role of intracellular pH, exocytosis and calcium. *Am. J. Physiol.* **258**, R222–R231.
- ARRUDA, J. A. L., SABATINI, S. AND WESTENFELDER, C. (1981). Vanadate inhibits urinary acidification by the turtle *Pseudemys scripta* bladder. *Kidney Int.* **20**, 772–779.
- ARRUDA, J. A. L., TAYLOR, Z. AND DYTOKO, C. (1988). Effect of agents that alter cell calcium and microfilaments on  $CO_2$  stimulated  $H^+$  secretion in the turtle bladder. *Archs int. Pharm. Therapie* **293**, 273–283.
- AVELLA, M. AND BORNANCIN, M. (1990). Ion fluxes in the gills of fresh water and seawater salmonid fish. In *Animal Nutrition and Transport Processes, Comparative Physiology*, vol. 6 (ed. J.-P. Truchot and B. Lahlou), pp. 1–13. Basel: Karger.
- BELLO-REUSS, E. (1991). Electrophysiological identification of cell types in cortical collecting duct monolayers. *Renal Physiol. Biochem.* **14**, 1–11.
- BROWN, D., GLUCK, S. AND HARTWIG, J. (1987a). Structure of the novel membrane-coating material in proton secreting epithelial cells and identification as an  $H^+$ -ATPase. *J. Cell Biol.* **105**, 1637–1648.
- BROWN, D., HIRSCH, S. AND GLUCK, S. (1988a). Localization of a proton-pumping ATPase in rat kidney. *J. clin. Invest.* **82**, 2114–2126.
- BROWN, D., HIRSCH, S. AND GLUCK, S. (1988b). An  $H^+$ -ATPase in opposite plasma membranes domains in kidney epithelial sub-populations. *Nature* **331**, 622–624.
- BROWN, D., ILIC, V. AND ORCI, L. (1987b). Rod-shaped particles in the plasma membrane of the mitochondria-rich cell of amphibian epidermis. *Anat. Rec.* **192**, 269–276.
- CANNON, C., VAN ADELBERG, J., KELLY, S. AND AL-AWQATI, Q. (1985). Carbon-dioxide-induced exocytotic insertion of  $H^+$  pumps in turtle bladder luminal membrane: role of cell pH and calcium. *Nature* **314**, 443–445.
- CLAUSEN, C. AND DIXON, T. E. (1986). Membrane electrical parameters in turtle bladder measured using impedance-analysis techniques. *J. Membr. Biol.* **92**, 9–19.
- COHEN, L. H. AND STEINMETZ, P. R. (1980). Control of active proton transport in turtle urinary bladder by cell pH. *J. gen. Physiol.* **76**, 381–394.
- DEVUYST, O., BEAUJEAN, V. AND CRABBÉ, J. (1991). Effects of environmental conditions on mitochondria-rich cell density and chloride transport in toad skin. *Pflügers Arch.* **417**, 577–581.
- DIXON, T. E., CLAUSEN, C. AND COACHMAN, D. (1988). Constitutive and transport-related endocytotic pathways in turtle bladder epithelium. *J. Membr. Biol.* **102**, 49–58.
- DIXON, T. E., CLAUSEN, C., COACHMAN, D. AND LANE, B. (1986). Proton transport and membrane shuttling in turtle bladder epithelium. *J. Membr. Biol.* **94**, 233–243.
- DIXON, T. T. AND AL-AWQATI, Q. (1979). Urinary acidification in turtle bladder is due to a reversible proton translocating ATPase. *Proc. natn. Acad. Sci. U.S.A.* **76**, 3135–3138.
- DIXON, T. T. AND AL-AWQATI, Q. (1980).  $H^+$ /ATP stoichiometry of the proton pump of turtle urinary bladder. *J. biol. Chem.* **255**, 3237–3239.
- DÖRGE, A., BECK, F.X., RICK, R., NAGEL, W. AND THURAU, K. (1989). Characterization of electrolyte transport mechanisms and compartments by the use of markers Rb and Br. In *Electron Probe Microanalysis: Applications in Biology and Medicine* vol. 4 (ed. K. Zierhold and H. K. Hagler), pp. 225–236. Springer Series in Biophysics.

- DÖRGE, A., RICK, R., BECK, F. X. AND NAGEL, W. (1988). Uptake of Br in mitochondria-rich and principal cells of toad skin epithelium. *Pflügers Arch.* **412**, 305–313.
- DURANTI, E., EHRENFELD, J. AND HARVEY, B. J. (1986). Acid secretion through *Rana esculenta* skin: involvement of an anion exchange mechanism at the basolateral membrane. *J. Physiol., Lond.* **378**, 195–211.
- DURHAM, J. H. AND NAGEL, W. (1986). Evidence for separate cellular origins of sodium and acid–base transport in turtle bladder. *Am. J. Physiol.* **250**, C609–C616.
- EHRENFELD, J. AND GARCIA-ROMEY, F. (1977). Active hydrogen excretion and sodium absorption through isolated frog skin. *Am. J. Physiol.* **233**, F46–F54.
- EHRENFELD, J. AND GARCIA-ROMEY, F. (1978). Coupling between chloride absorption and base excretion in isolated skin of *Rana esculenta*. *Am. J. Physiol.* **235**, F33–F39.
- EHRENFELD, J., GARCIA-ROMEY, F. AND HARVEY, B. J. (1985). Electrogenic active proton pump in *Rana esculenta* skin and its role in sodium ion transport. *J. Physiol., Lond.* **359**, 331–355.
- EHRENFELD, J., LACOSTE, I., GARCIA-ROMEY, F. AND HARVEY, B. J. (1990). Interdependence of Na<sup>+</sup> and H<sup>+</sup> transport in frog skin. In *Animal Nutrition and Transport Processes, Comparative Physiology*, vol. 6 (ed. J.-P. Truchot and B. Lahlou), pp. 152–170. Basel: Karger.
- EHRENFELD, J., LACOSTE, I. AND HARVEY, B. J. (1989). The key role of the mitochondria-rich cell in Na<sup>+</sup> and H<sup>+</sup> transport across frog skin epithelium. *Pflügers Arch.* **414**, 59–67.
- FANESTIL, D. D. AND PARK, C. S. (1981). Effects of inhibitors of F<sub>0</sub>-F<sub>1</sub> proton translocating ATPase on urinary acidification. *Am. J. Physiol.* **240**, C201–C206.
- FARQUHAR, M. G. AND PALADE, G. E. (1964). Functional organization of amphibian skin. *Proc. natn. Acad. Sci. U.S.A.* **51**, 569–577.
- FORGAC, M. (1989). Structure and function of vacuolar class of ATP driven proton pumps. *Physiol. Rev.* **69**, 765–796.
- FRAZIER, L. W. (1978). Cellular changes in the toad urinary bladder in response to metabolic acidosis. *J. Membr. Biol.* **40**, 165–177.
- FRAZIER, L. W. AND VANATTA, J. C. (1971). Excretion of H<sup>+</sup> and NH<sub>4</sub><sup>+</sup> by the urinary bladder of the acidotic toad and the effect of short-circuit current on the excretion. *Biochim. biophys. Acta* **241**, 20–29.
- FRÖMTER, E. (1988). Mechanisms and regulation of ion transport in the renal collecting duct. *Comp. Biochem. Physiol. A* **90**, 701–777.
- FUTAI, M., NOUMI, T. AND MAEDA, M. (1989). ATP synthase (H<sup>+</sup>-ATPase): Results by combined biochemical and molecular biological approaches. *A. Rev. Biochem.* **58**, 111–136.
- GARCIA-ROMEY, F., SALIBIAN, A. AND PEZZANI-HERNANDEZ, (1969). The nature of the *in vivo* sodium and chloride uptake mechanisms through the epithelium of the Chilean frog *Calyptocephalella gayi* (Dum. et Bibr., 1841). Exchanges of hydrogen against sodium and bicarbonate against chloride. *J. gen. Physiol.* **53**, 816–835.
- GLUCK, S. AND CALDWELL, J. (1988). Proton-translocating ATPase from bovine kidney medulla: partial purification and reconstitution. *Am. J. Physiol.* **254**, F71–F79.
- GLUCK, S., CANNON, C. AND AL-AWQATI, Q. (1982). Exocytosis regulates urinary acidification by rapid insertion of H<sup>+</sup> pumps into the luminal membrane. *Proc. natn. Acad. Sci. U.S.A.* **79**, 4327–4331.
- HARRIS, H. W., JR, KIKERI, D., JANOSHAZI, A., SOLOMON, A. K. AND ZEIDEL, M. L. (1991). High proton flux through membranes containing antidiuretic hormone water channels. *Am. J. Physiol.* **259**, F366–F371.
- HARVEY, B. J. AND EHRENFELD, J. (1986). Regulation of intracellular sodium and pH by the electrogenic H<sup>+</sup> pump in frog skin. *Pflügers Arch.* **406**, 362–366.
- HARVEY, B. J. AND EHRENFELD, J. (1988a). Epithelial pH and ion transport regulation by proton pumps and exchangers. *Ciba Foundation Symposium* 139. *Proton Passage Across Cell Membranes*. pp. 139–164. Chichester: Wiley.
- HARVEY, B. J. AND EHRENFELD, J. (1988b). Dual role for intracellular protons in the control of sodium transport in frog skin epithelium. *Pflügers Arch.* **411**(Suppl. 1), R66.
- HARVEY, B. J. AND KERNAN, R. P. (1984). Intracellular ionic activities in relation to external sodium and the effects of amiloride and/or ouabain. *J. Physiol., Lond.* **349**, 501–517.
- HARVEY, B. J., LACOSTE, I. AND EHRENFELD, J. (1991). Common channels for water and protons at apical and basolateral cell membranes of frog skin and urinary bladder epithelia. Effects of oxytocin, heavy metals and inhibitors of H<sup>+</sup>-adenosine triphosphatase. *J. gen. Physiol.* **97**, 749–776.

- HARVEY, B. J. AND LARSEN, B. J. (1992). Sodium and chloride currents in single mitochondria-rich cells of amphibian skin. Proc. physiol. Soc. Oxford Meeting July. *J. Physiol., Lond.* (in press).
- HARVEY, B. J., THOMAS, S. R. AND EHRENFELD, J. (1988). Intracellular pH controls membrane  $\text{Na}^+$  and  $\text{K}^+$  conductances and transport in frog skin epithelium. *J. gen. Physiol.* **92**, 767–791.
- HORN, R. AND MARTY, A. (1988). Muscarinic activation of ionic currents measured by a new whole-cell recording method. *J. gen. Physiol.* **92**, 145–160.
- HUSTED, R. F., MUELLER, A. L., KESSEL, R. G. AND STEINMETZ, P. R. (1981). Surface characteristics of carbonic anhydrase-rich cells in turtle urinary bladder. *Kidney Intl* **19**, 491–502.
- ILIC, V. AND BROWN, D. (1980). Modification of mitochondria-rich cells in different ionic conditions: Changes in cell morphology and cell number in the skin of *Xenopus laevis*. *Anat. Rec.* **196**, 153–161.
- KATZ, U. (1986). The role of the amphibian epidermis in osmoregulation and its adaptive response to changing environment. In *Biology of the Integument*, vol. 2, *Vertebrates* (ed. J. Bereiter-Hahn, A. G. Matoltsy and K. S. Richards), pp. 472–498.
- KATZ, U. AND GABBAY, S. (1988). Mitochondria-rich cells and carbonic anhydrase content of toad skin epithelium. *Cell Tissue Res.* **251**, 425–431.
- KATZ, U. AND SCHEFFEY, C. (1986). The voltage-dependent chloride current conductance of toad skin is localized to mitochondria-rich cells. *Biochim. biophys. Acta* **861**, 480–482.
- KATZ, U., VAN DRIESCHE, W. AND SCHEFFEY, C. (1985). The role of mitochondria-rich cells in the chloride current conductance across toad skin. *Biol. Cell* **55**, 245–250.
- KELLY, S., DIXON, T. E. AND AL-AWQATI, Q. (1980). Metabolic pathways coupled to hydrogen ion transport in turtle *pseudemys scripta* urinary bladder. *J. Membr. Biol.* **54**, 237–244.
- KHADOURI, C., MARSY, S., BARLET-BAS, C. AND DOUCET, A. (1989). Short-term effect of aldosterone on NEM-sensitive ATPase in rat collecting tubule. *Am. J. Physiol.* **257**, F177–F181.
- KIRSCHNER, L. B. (1982).  $\text{NaCl}$  transport in intact frogs and isolated frog skins: a reconciliation. In *Functional Regulation at the Cellular and Molecular Levels* (ed. R.A. Corradino), pp. 199–215. Amsterdam: Elsevier North Holland.
- KIRSCHNER, L. B. (1988). Basis for apparent saturation kinetics of  $\text{Na}^+$  influx in fresh water hyperregulators. *Am. J. Physiol.* **254**, R984–R988.
- KOEFOED-JOHNSEN, V. AND USSING, H. H. (1958). The nature of the frog skin potential. *Acta physiol. scand.* **42**, 298–308.
- KOEPPEN, B. M. (1987). Electrophysiological identification of principal and intercalated cells in the rabbit outer medullary collecting duct. *Pflügers Arch.* **409**, 138–141.
- KRIPPEIT-DREWS, P., DREWS, G. AND GRASZYNSKI, K. (1989). Effects of ion substitution on the transepithelial potential difference of the gills of the fiddler crab *Uca-tangeri*: Evidence for a proton pump in the apical membrane. *J. comp. Physiol B* **159**, 43–50.
- KRISTENSEN, P. AND USSING, H. H. (1985). Epithelial organization. In *The Kidney: Physiology and Pathophysiology* (ed. D. W. Seldin and G. Giebisch), pp. 173–188. New York: Raven Press.
- KROGH, A. (1939). *Osmotic Regulation in Aquatic Animals*. Cambridge: Cambridge University Press.
- LARSEN, E. H. (1991). Chloride transport by high-resistance heterocellular epithelia. *Physiol. Rev.* **71**, 235–283.
- LARSEN, E. H. AND HARVEY, B. J. (1992). Chloride currents of single mitochondria-rich cells. *FASEB J.* **6**, A1237–A1741.
- LARSEN, E. H. AND RASMUSSEN, B. E. (1982). Chloride channels in toad skin. *Phil. Trans. R. Soc. Lond. B* **299**, 413–434.
- LARSEN, E. H., USSING, H. H. AND SPRING, K. R. (1987). Ion transport by mitochondria-rich cells in toad skin. *J. Membr. Biol.* **99**, 25–40.
- LARSEN, E. H., WILLUMSEN, N. J. AND CHRISTOFFERSEN, B. C. (1992). Role of proton pump of mitochondria-rich cells for active transport of chloride ions in toad skin epithelium. *J. Physiol., Lond.* **450**, 203–216.
- LINDAU, M. AND NEHER, E. (1988). Patch-clamp techniques for time-resolved capacitance measurements in single cells. *Pflügers Arch.* **411**, 137–146.
- LUDENS, J. H. AND FANESTIL, D. D. (1972). Acidification of urine by the isolated urinary bladder of the toad. *Am. J. Physiol.* **223**, 1338–1344.
- LUDENS, J. H. AND FANESTIL, D. D. (1974). Aldosterone stimulation of acidification of urine by the isolated urinary bladder of the Columbian toad. *Am. J. Physiol.* **226**, 1321–1326.
- MACHEN, T. AND ERLI, D. (1975). Some features of hydrogen (ion) secretion by the frog skin. *Biochim. biophys. Acta* **406**, 120–130.

- MADSEN, K. M. AND TISHER, C. C. (1984). Response of intercalated cells of rat outer medullary collecting duct to chronic metabolic acidosis. *Lab. Invest.* **51**, 268–276.
- MADSEN, K. M. AND TISHER, C. C. (1985). Structure–function relationships in  $H^+$ -secreting epithelia. *Fedn Proc. Fedn Am. Socs exp. Biol.* **44**, 2704–2709.
- MUJAIS, S. K. (1987). Effects of aldosterone on rat collecting tubule *N*-ethylmaleimide-sensitive adenosine triphosphatase. *J. Lab. clin. Med.* **109**, 34–39.
- NAGEL, W. AND VAN DRIESCHE, W. (1991). Chloride-related current fluctuation in amphibian skin. *Pflügers Arch.* **418**, 544–550.
- PAGE, R. D. AND FRAZIER, L. W. (1987). Morphological changes in the skin of *Rana pipiens* in response to metabolic acidosis. *Proc. Soc. exp. Biol. Med.* **184**, 416–422.
- PALMER, L. J. AND FRINDT, G. (1986). Amiloride-sensitive  $Na^+$  channels from the apical membrane of rat cortical collecting tubule. *Proc. natn. Acad. Sci. U.S.A.* **83**, 2767–2770.
- PERRONE, R. D., NYE, J. P., MCBRIDE, D. E., ZAHNISER, D. J., GEYER, J. J. AND UCCI, A. A. (1990). Aldosterone induces apical vesicles in rat distal colon. *Am. J. Physiol.* **259**, F65–F71.
- RAMSAY, A. G. (1982). Membrane potentials, resistances and conductances of toad *Bufo marinus* bladder during sodium and hydrogen ion transport. *Proc. Soc. exp. Biol. Med.* **170**, 94–102.
- REEVES, W., GLUCK, S. AND AL-AWQATI, Q. (1983). Role of endocytosis in  $H^+$  transport regulation by turtle bladder. *Kidney Int.* **23**, 237.
- RICH, A., DIXON, T. E. AND CLAUSEN, C. (1990). Changes in membrane conductances and areas associated with bicarbonate secretion in turtle bladder. *J. Membr. Biol.* **113**, 211–219.
- RICK, R. (1992). Different types of mitochondria-rich cells in the frog skin epithelium. *J. Membr. Biol.* (in press).
- RICK, R., DÖRGE, A., VON ARNIM, E. AND THURAU, K. (1978). Electron microprobe analysis of frog skin epithelium: Evidence for a syncytial sodium transport compartment. *J. Membr. Biol.* **39**, 313–331.
- ROSEN, S. AND FRIEDLEY, N. J. (1973). Carbonic anhydrase activity in *Rana pipiens* skin: Biochemical and histochemical analysis. *Histochemie* **36**, 1–4.
- SABOLIC, I. AND BURCKHARDT, G. (1986). Characteristics of the proton pump in rat renal cortical endocytotic vesicles. *Am. J. Physiol.* **250**, F817–F826.
- SAPIRSTEIN, V. S. AND SCOTT, W. N. (1975). Binding of aldosterone by mitochondria-rich cells of the toad urinary bladder. *Nature* **257**, 241–243.
- SAUER, M., FLEMMER, A., THURAU, K. AND BECK, F.-Z. (1990). Sodium entry routes in principal and intercalated cells of the isolated perfused cortical collecting duct. *Pflügers Arch.* **416**, 88–93.
- SCHAEERER, E., NEUTRA, M. R. AND KRAEHNBUHL, J.-P. (1991). Molecular and cellular mechanisms involved in transepithelial transport. *J. Membr. Biol.* **123**, 93–103.
- SCHWARTZ, G. J. AND AL-AWQATI, Q. (1985). Carbon dioxide causes exocytosis of vesicles containing hydrogen ion pumps in isolated perfused proximal and collecting tubules. *J. clin. Invest.* **75**, 1638–1644.
- SCHWARTZ, G. J. AND AL-AWQATI, Q. (1986). Regulation of transepithelial  $H^+$  transport by exocytosis and endocytosis. *A. Rev. Physiol.* **48**, 153–161.
- SCHWARTZ, G. J., BARASCH, J. AND AL-AWQATI, Q. (1985). Plasticity of functional epithelial polarity. *Nature* **318**, 368–371.
- SCHWARTZ, J., BETHENCOURT, D. AND ROSEN, S. (1982). Specialized function of carbonic anhydrase-rich and granular cells in turtle bladder. *Am. J. Physiol.* **242**, F627–F633.
- SCHWARTZ, J. AND STEINMETZ, P. R. (1977). Metabolism, energy and  $pCO_2$  as determinants of  $H^+$  secretion in turtle urinary bladder. *Am. J. Physiol.* **233**, F145–F149.
- SCHWARTZ, J. H. AND STEINMETZ, P. R. (1971).  $CO_2$  requirements for  $H^+$  secretion by the isolated bladder. *Am. J. Physiol.* **220**, 2051–2057.
- SEBALD, W., FRIEDL, P., SCHAIRER, H. U. AND HOPPE, J. (1982). Structure and genetics of the  $H^+$  conducting  $F_0$  portion of the ATP synthase. *Ann. N.Y. Acad. Sci.* **402**, 28–44.
- SENIOR, A. E. AND WISE, J. G. (1983). The proton ATPase of bacteria and mitochondria. *J. Membr. Biol.* **73**, 105–124.
- SOLIOZ, M. (1984). Dicyclohexylcarbodiimide as a probe for proton translocation enzymes. *Trends biol. Sci.* **July** 309–312.
- SPRING, K. R. AND USSING, H. H. (1986). The volume of mitochondria-rich cells of frog skin epithelium. *J. Membr. Biol.* **92**, 21–26.
- STEINMETZ, P. R. (1974). Cellular mechanism of urinary acidification. *Physiol. Rev.* **54**, 890–956.
- STEINMETZ, P. R. (1986). Cellular organization of urinary acidification. *Am. J. Physiol.* **251**, F173–F187.

- STEINMETZ, P. R. (1988). Electrogenic proton transport by intercalated cells of tight urinary epithelia. *Ciba Foundation Symposium* **139**, *Proton Passage Across Cell Membranes*. pp. 122–138. Chichester: Wiley.
- STEINMETZ, P. R. AND ANDERSEN, O. J. (1982). Electrogenic proton transport in epithelial membranes. *J. Membr. Biol.* **65**, 155–174.
- STEINMETZ, P. R. AND STETSON, D. L. (1987). Cellular organization of active proton transport in urinary epithelia. In *Contemporary Issues in Nephrology. Modern Techniques of Ion Transport*, vol. 15 (ed. B. M. Brenner and J. H. Stein), pp. 67–89. New York: Churchill Livingstone.
- STETSON, D. L. (1989). Turtle urinary bladder regulation of ion transport by dynamic changes in plasma membrane area. *Am. J. Physiol.* **257**, R973–R981.
- STETSON, D. L. AND STEINMETZ, P. R. (1983). Role of membrane fusion in CO<sub>2</sub> stimulation of proton secretion by turtle bladder. *Am. J. Physiol.* **245**, C113–C120.
- STETSON, D. L. AND STEINMETZ, P. R. (1985).  $\alpha$  and  $\beta$  types of carbonic anhydrase-rich cells in the turtle bladder. *Am. J. Physiol.* **249**, F553–F565.
- STETSON, D. L. AND STEINMETZ, P. R. (1986). Correlation between apical intramembrane particles and H<sup>+</sup> secretion during CO<sub>2</sub> stimulation in turtle bladder. *Pflügers Arch.* **407**, S80–S84.
- STONE, D. AND XIE, X.-S. (1988). Proton translocating ATPases. *Kidney Int.* **33**, 767–774.
- STRID, A., NYRÉN, P. AND BALTSCHIEFFSKY, M. (1988). Diethylstilbestrol. Interactions with membranes and proteins and the different effects upon Ca<sup>2+</sup>- and Mg<sup>2+</sup>-dependent activities of the F<sub>1</sub>-ATPase from *Rhodospirillum rubrum*. *Eur. J. Biochem.* **176**, 281–285.
- VAN ADELSBERG, J. AND AL-AWQATI, Q. (1986). Regulation of cell pH by Ca<sup>2+</sup>-mediated exocytotic insertion of H<sup>+</sup>-ATPases. *J. Cell Biol.* **102**, 1638–1645.
- VAN DRIESSCHE, W. AND ZEISKE, W. (1985). Ionic channels in epithelial cell membranes. *Physiol. Rev.* **65**, 833–903.
- VOÛTE, C. L., HÄNNI, S. AND AMMANN, E. (1972). Aldosterone induced morphological changes in amphibian epithelia *in vivo*. *J. Steroid Biochem.* **3**, 161–165.
- WILLUMSEN, N. J. AND LARSEN, E. H. (1986). Membrane potentials and intracellular Cl<sup>−</sup> activity of toad skin epithelium in relation to activation and deactivation of the transepithelial Cl<sup>−</sup> conductance. *J. Membr. Biol.* **94**, 173–190.
